# Supplementary material for: Prevalence and Severity of Myocardial Perfusion Imaging Abnormalities in Inmate Subjects
Source: PLoS One. 2015 Jul 22;10(7):e0133360. doi: 10.1371/journal.pone.0133360 (PMC4511677; doi:10.1371/journal.pone.0133360)
Supplement: S2 Dataset — Individual demographic data, clinical characteristics and MPS results in inmate and non-inmate subjects after propensity score matching. (XLS) [file pone.0133360.s002.xls]

## Sheet: FileDetenutiMatch
subject id	inmate status	male gender	age	diabetes	hypertension	dyslipidemia	smoke	CAD family history	chest pain	prior MI	prior rev	sss	srs	sds	ef stress	stress type	mets	max test	st	angina index
674	0	0	56	0	1	1	0	1	0	0	0	0	0	0	53	0	8.8	1	0	0
1414	0	0	62	0	1	1	1	1	1	0	0	2	0	0	53	0	9	1	1	0
2089	0	0	61	0	1	0	1	1	1	1	1	2	2	4	53	0	4.6	1	0	0
1421	0	0	46	0	0	0	0	0	1	0	0	1	0	0	53	0	12.1	1	0	0
1277	0	0	62	0	1	1	1	1	0	0	1	2	0	0	53	1			0	0
1138	0	0	64	1	1	1	1	0	0	1	1	4	4	0	53	0	4.85	0	0	0
1757	0	0	76	0	0	0	0	0	0	0	0	2	1	1	53	0	9	1	0	0
1275	0	0	69	0	1	1	1	0	0	1	1	7	6	0	53	1			0	0
210	0	0	58	0	1	1	0	0	1	0	0	6	3	3	53	0	13.2	0	0	0
1084	0	0	60	1	1	1	0	0	1	0	0	0	0	0	53	0	12	0	0	0
963	0	0	53	1	1	1	1	1	0	1	0	6	3	2	53	0	8.2	0	0	0
1078	0	0	58	1	1	1	1	0	0	1	1	4	0	4	53	0	6	1	0	0
55	0	0	62	1	1	0	1	0	0	1	0	0	0	0	53	0	6.7	0	0	0
83	0	0	71	0	1	0	1	0	1	1	1	26	26	0	53	0	11.2	0	0	0
840	0	0	22	0	0	0	1	1	0	0	0	2	0	0	53	0	16.5	0	0	0
1885	0	0	47	0	1	1	0	1	1	1	1	6	0	6	53	0	7	0	0	0
1742	0	0	49	0	1	1	1	1	0	1	1	40	40	0	18	1			0	0
564	0	0	58	1	1	1	0	0	1	1	1	0	0	0	20	1			0	0
767	0	0	55	0	0	0	0	0	1	1	0	3	0	3	22	0	11.2	0	0	0
1645	0	0	50	1	1	1	0	1	1	1	1	39	29	7	24	0	4.6	0	0	0
1751	0	0	57	0	0	1	1	0	0	1	1	11	11	0	26	1			0	0
17	0	0	65	1	0	1	1	0	1	0	0	18	18	0	26	0	8.8	1	0	0
642	0	0	44	0	1	1	0	1	0	1	1	8	8	0	26	0	13.2	1	0	0
440	0	0	52	1	1	1	1	1	0	1	1	21	14	7	27	1			0	0
601	0	0	52	1	1	1	0	1	1	1	1	43	43	0	27	0	8.8	1	0	0
1077	0	0	76	1	1	1	0	0	0	1	0	28	28	0	28	0	6.6	0	0	0
2002	0	0	61	1	0	1	0	0	1	1	1	27	23	0	28	0	6.6	1	0	0
1579	0	0	56	1	1	1	1	0	1	1	1	16	2	13	29	0	6.6	1	1	0
1695	0	0	51	1	1	1	1	1	1	1	1	7	5	2	29	1			0	0
1514	0	0	50	1	1	1	1	1	1	0	1	7	7	0	30	0	9	1	1	0
2145	0	0	49	0	1	1	1	0	1	1	1	6	6	0	31	0	14.1	1	0	0
2156	0	0	40	0	0	1	1	0	0	1	1	25	25	0	31	1			0	0
149	0	0	59	0	1	1	1	0	0	0	0	0	0	0	31	1			0	0
157	0	0	64	1	1	1	1	0	1	1	0	17	14	3	32	1			0	0
960	0	0	53	1	1	1	1	0	1	0	0	3	0	3	32	0	5.7	0	0	0
2111	0	0	53	0	1	1	1	1	1	1	1	6	3	3	33	1			0	0
1592	0	0	72	1	1	0	1	0	0	1	1	10	10	6	33	1			0	0
518	0	0	47	0	0	1	0	1	1	1	1	39	39	0	34	0	13.2	1	0	0
806	0	0	80	0	0	0	0	0	1	1	0	7	0	7	34	1			0	0
2105	0	0	57	0	1	1	1	0	1	1	1	16	13	1	34	0	7.5	1	0	0
1830	0	0	45	0	1	1	1	1	0	1	1	15	14	0	34	0	13.4	1	0	0
584	0	0	68	0	1	1	1	0	1	1	1	12	9	2	34	0	6.7	1	1	0
1925	0	0	47	0	1	1	1	1	1	1	1	14	12	3	36	0	10.8	0	0	0
574	0	0	52	0	1	1	0	1	0	1	1	25	25	0	36	0	13.2	1	0	0
1599	0	0	54	1	1	1	1	0	0	1	0	22	14	6	36	0	9	0	0	0
1598	0	0	63	1	1	1	1	0	1	1	1	3	0	3	37	0	11	1	0	0
1940	0	0	59	0	0	1	1	1	0	1	0	15	12	2	37	0	10.4	1	0	0
1397	0	0	53	0	0	1	1	0	0	1	0	16	15	1	38	0	8.4	1	0	0
595	0	0	73	0	1	1	0	1	0	1	1	7	5	2	38	0	8.8	1	0	0
599	0	0	57	1	1	1	0	0	1	1	1	10	2	8	38	0	11.2	1	0	0
1552	0	0	52	1	1	1	1	1	1	1	0	3	0	3	38	0	8.5	1	1	0
1086	0	0	38	0	1	1	1	0	0	1	1	19	19	0	39	1			0	0
163	0	0	59	1	1	1	1	0	0	0	0	0	0	0	39	1			0	0
1889	0	0	56	0	0	1	1	1	0	0	0	2	0	2	39	0	11	1	0	0
2150	0	0	58	1	1	1	1	1	1	1	1	27	22	1	39	0	9.33	0	0	0
1491	0	0	63	0	0	0	0	0	1	0	0	1	0	0	39	0	10.9	1	0	0
489	0	0	51	1	1	0	0	1	0	0	0	0	0	0	39	0	8.8	1	0	0
35	0	0	62	0	1	1	1	1	1	0	0	15	12	3	40	1			0	0
2025	0	0	57	1	1	1	1	0	0	1	1	3	0	3	40	1			0	0
295	0	0	33	0	0	0	0	0	1	0	0	0	0	0	40	1			0	0
1096	0	0	40	0	1	1	1	1	0	1	1	3	3	0	41	0	12.6	1	0	0
1651	0	0	58	0	1	1	1	0	1	0	0	7	0	7	41	1			0	0
1224	0	0	37	0	0	0	0	1	1	0	0	0	0	0	41	0	14.1	1	0	0
92	0	0	74	0	0	1	1	0	1	1	0	6	3	3	41	1			0	0
1440	0	0	60	1	1	1	1	0	1	0	1	3	0	3	42	0	5.6	1	0	0
1036	0	0	47	0	1	1	1	0	0	0	0	3	0	3	42	1			0	0
1718	0	0	31	0	1	1	1	1	1	0	0	1	0	0	42	0	10.2	1	0	0
196	0	0	33	0	1	0	0	0	0	0	0	5	5	0	42	0	6.7	1	0	0
1767	0	0	65	0	1	0	1	1	0	0	0	3	0	3	42	0	10.9	1	0	0
1497	0	0	48	0	1	1	1	0	0	0	0	5	0	5	43	0	13.6	1	0	0
934	0	0	37	0	1	0	1	1	0	0	0	7	0	7	43	0	13.4	1	0	0
3	0	0	46	0	1	1	1	1	1	1	1	0	0	0	43	0	11.2	1	0	0
1333	0	0	65	0	0	1	1	1	1	1	1	11	11	0	43	0	12.9	1	1	0
1042	0	0	55	0	0	1	1	0	0	0	0	8	0	8	43	0	4.2	0	0	0
946	0	0	49	0	1	1	0	1	0	0	0	1	0	0	43	0	7.9	1	1	0
2128	0	0	41	0	0	0	0	0	0	0	0	0	0	0	43	0	12	0	0	0
267	0	0	52	1	1	0	1	0	1	1	0	6	1	5	43	1			0	0
102	0	0	62	0	0	1	0	0	0	1	0	9	5	4	44	1			0	0
1408	0	0	40	0	1	0	0	0	1	0	0	0	0	0	44	0	15.1	1	0	0
1816	0	0	51	0	0	1	1	0	0	1	0	7	4	4	44	0	13.4	0	0	0
1561	0	0	71	0	1	1	0	1	1	1	0	4	4	0	44	0	9.5	0	0	0
1969	0	0	58	0	1	0	1	1	1	1	1	0	0	0	44	0	10.8	1	0	0
1147	0	0	38	0	0	1	0	1	0	1	1	7	3	4	44	0	11	1	0	0
1466	0	0	61	0	1	0	1	0	1	0	0	0	0	0	44	1			0	0
1580	0	0	64	1	1	1	1	1	1	1	1	13	5	8	44	0	6.7	1	0	0
669	0	0	39	0	1	1	1	1	1	1	1	16	16	0	45	1			0	0
1013	0	0	70	0	0	0	0	1	1	0	0	2	0	0	45	0	11	1	0	0
1405	0	0	71	0	1	0	0	0	1	0	0	7	0	7	45	0	6.6	1	1	0
718	0	0	44	0	1	1	1	1	0	1	1	3	3	0	45	1			0	0
697	0	0	42	0	0	1	1	0	0	1	1	6	3	3	45	0	8.2	0	0	0
685	0	0	60	1	1	1	1	0	1	1	0	3	0	3	46	1			0	0
1576	0	0	62	1	1	1	1	0	0	1	1	8	8	4	46	1			0	0
1949	0	0	50	0	1	1	0	0	0	0	0	1	0	0	46	0	11	1	0	0
684	0	0	71	1	1	1	1	0	1	1	1	6	4	2	46	1			0	0
1738	0	0	52	0	1	0	0	1	1	0	0	1	0	0	46	1			0	0
551	0	0	58	0	1	1	0	0	1	1	1	19	14	2	47	0	11.2	1	0	0
1241	0	0	57	0	1	0	1	0	1	1	1	12	12	0	47	0	12	1	0	0
1082	0	0	57	0	1	1	1	1	0	1	1	3	2	0	47	0	12.1	0	0	0
622	0	0	40	0	1	1	0	1	1	1	1	9	9	0	48	0	13.2	1	0	0
630	0	0	64	0	0	0	1	1	0	1	1	7	7	0	48	0	8.8	1	0	0
1377	0	0	53	0	1	0	1	0	1	1	1	2	0	0	48	0	12	1	0	0
1794	0	0	49	1	1	1	1	1	1	0	0	2	0	0	48	0	10.5	1	0	0
2043	0	0	69	0	1	1	1	1	0	1	1	1	0	0	48	0	11	0	0	0
1080	0	0	27	0	0	0	1	1	0	0	0	2	0	0	48	0	13	1	0	0
750	0	0	49	0	1	0	1	1	1	0	0	5	0	5	48	0	11.2	0	0	0
1875	0	0	52	1	1	1	0	1	0	1	1	3	3	0	48	0	13.7	1	0	0
712	0	0	53	0	1	1	0	0	0	1	1	7	7	0	49	0	11.2	1	0	0
1547	0	0	68	0	1	1	0	0	0	1	1	4	4	0	49	0	8.3	1	0	0
695	0	0	39	0	0	0	1	1	1	1	1	8	8	0	49	0	13.2	0	0	0
1039	0	0	58	0	1	1	0	0	0	0	1	2	0	0	49	0	15.7	1	0	0
1932	0	0	61	0	1	1	1	0	1	0	0	7	4	2	49	0	8.8	0	0	0
1018	0	0	44	0	0	1	1	1	1	1	1	3	0	3	50	1			0	0
307	0	0	48	0	1	0	1	0	0	0	0	6	0	6	50	1			0	0
449	0	0	70	0	0	1	1	1	1	1	1	14	11	3	50	0	6.7	0	0	0
1864	0	0	60	1	1	0	0	0	0	1	1	2	0	0	50	0	10.5	0	0	0
827	0	0	42	0	0	1	0	0	0	0	0	1	0	0	50	0	12.2	1	0	0
426	0	0	64	0	1	1	0	1	1	1	1	6	0	6	50	0	6.7	0	0	0
633	0	0	49	1	1	0	1	0	0	1	1	0	0	0	51	1			0	0
744	0	0	0	0	1	0	1	1	0	1	0	14	3	10	51	1			0	0
541	0	0	54	0	0	1	1	1	1	1	1	14	6	8	51	0	13.2	1	0	0
204	0	0	66	1	1	1	1	0	0	0	0	4	0	4	51	0	11.2	0	0	0
1555	0	0	54	0	1	0	1	1	0	0	0	3	0	3	51	1			0	0
294	0	0	39	0	0	0	1	1	1	0	0	4	0	4	51	1			0	0
1564	0	0	62	1	1	1	1	0	0	1	0	9	9	0	51	1			0	0
627	0	0	41	0	0	1	0	0	1	0	0	0	0	0	51	0	13.2	1	0	1
257	0	0	72	0	1	0	0	0	1	0	0	0	0	0	52	1			0	0
1977	0	0	28	0	1	1	0	0	1	0	0	1	0	0	52	1			0	0
1052	0	0	53	1	1	1	1	0	1	0	0	2	0	0	52	0	11	1	0	0
1219	0	0	62	0	0	1	0	1	0	0	0	2	0	0	52	0	10.5	1	0	0
1155	0	0	48	1	1	0	1	0	1	0	1	7	7	0	53	1			0	0
1614	0	0	51	0	0	0	1	0	0	0	0	2	0	0	53	0	13	1	0	0
2035	0	0	62	0	0	0	1	0	0	0	0	2	0	0	53	0	7.4	1	0	0
794	0	0	55	1	1	1	0	0	1	1	0	7	4	3	53	0	11.2	1	0	0
1714	0	0	59	1	1	1	0	0	0	1	0	2	0	0	53	0	10	1	1	0
1609	0	0	49	0	1	1	1	1	1	1	1	1	0	0	53	1			0	0
7	0	0	55	0	1	1	0	0	1	1	1	0	0	0	53	0	11.2	1	0	0
2166	0	0	49	0	1	1	1	1	0	1	1	2	0	0	53	0	15.8	1	0	0
1048	0	0	36	0	0	0	1	1	1	1	1	3	0	3	53	0	12.9	0	0	0
1231	0	0	38	0	1	1	1	1	0	1	1	5	2	2	53	0	11	0	0	0
1860	0	0	51	0	0	0	0	0	0	0	0	2	0	0	54	1			0	0
800	0	0	44	0	1	0	1	1	1	0	0	2	0	0	54	0	8.8	1	0	0
1290	0	0	40	0	1	0	0	0	1	0	0	4	0	4	54	0	12.1	1	0	0
350	0	0	62	0	1	1	1	0	0	0	0	0	0	0	54	0	11.2	1	0	0
655	0	0	54	0	0	1	0	1	0	1	1	7	6	1	54	0	8.8	1	0	0
1941	0	0	67	1	0	1	0	0	0	1	1	2	0	0	54	0	7.7	1	1	0
446	0	0	59	1	1	1	0	0	0	1	1	0	0	0	55	0	6.7	1	0	0
39	0	0	70	1	1	0	1	0	1	0	0	0	0	0	55	0	13.2	1	0	0
292	0	0	48	1	1	1	1	1	1	0	0	0	0	0	55	0	8.8	1	0	0
329	0	0	31	0	1	0	0	0	0	0	0	0	0	0	55	0	13.2	1	0	0
1126	0	0	35	0	0	0	0	1	0	1	1	4	0	4	55	1			0	0
467	0	0	46	0	0	1	0	1	0	1	1	3	3	0	55	0	13.2	0	0	0
394	0	0	58	1	1	1	0	0	0	1	1	4	0	4	56	0	13.2	0	0	0
1188	0	0	54	0	1	1	0	1	0	1	1	10	10	0	56	0	8.8	1	0	0
159	0	0	44	1	0	0	1	0	1	0	0	0	0	0	56	1			0	0
444	0	0	60	0	1	1	1	0	1	1	1	9	0	9	56	0	13.2	0	0	0
1409	0	0	36	0	0	1	1	1	1	0	0	0	0	0	56	0	9	1	0	0
2031	0	0	37	0	1	1	0	1	1	1	1	4	0	4	57	0	14.4	1	1	0
1675	0	0	61	0	1	1	0	0	0	1	1	10	3	8	57	0	13.9	0	0	0
1622	0	0	43	0	1	1	1	1	1	1	1	2	0	0	57	0	13	0	0	0
665	0	0	64	1	0	0	0	0	0	0	0	0	0	0	57	0	6.7	1	0	0
605	0	0	47	1	0	1	0	0	1	1	1	3	0	3	57	1			0	0
2177	0	0	47	0	1	1	1	0	0	1	1	7	5	2	57	0	15.8	1	0	0
220	0	0	60	1	1	1	1	1	1	0	0	0	0	0	57	1			0	0
49	0	0	48	0	0	1	0	1	0	1	1	0	0	0	58	0	14.1	0	0	0
19	0	0	35	0	0	0	1	0	1	0	0	0	0	0	58	0	13.2	1	0	0
2126	0	0	35	1	0	0	1	0	0	0	0	3	0	3	58	0	15.3	0	0	0
477	0	0	35	0	0	0	1	0	0	0	0	0	0	0	58	0	13.2	1	0	0
2098	0	0	40	1	1	1	0	1	0	0	1	2	0	0	58	0	11	1	1	0
1476	0	0	39	1	1	1	0	0	1	0	0	9	0	9	58	0	5.7	1	0	0
1674	0	0	60	0	1	1	0	1	0	1	1	6	0	6	58	0	11.2	1	0	0
1439	0	0	13	0	0	0	0	1	0	0	0	2	0	0	58	0	18.4	1	0	0
1724	0	0	37	0	0	0	1	0	1	0	0	2	0	0	59	0	15.4	1	0	0
997	0	0	59	1	1	0	0	0	0	1	0	2	0	0	59	1			0	0
1413	0	0	41	0	1	0	0	0	0	0	0	1	0	0	59	0	12.9	1	0	0
1881	0	0	58	0	1	1	1	0	1	1	0	0	0	0	59	0	10.1	0	0	0
1016	0	0	45	1	1	1	0	0	0	1	1	6	0	6	59	0	7.7	0	0	0
465	0	0	55	0	0	0	1	0	1	0	0	6	4	2	59	0	11.2	1	0	0
1339	0	0	45	0	0	0	1	0	1	0	0	2	0	0	59	1			0	0
52	0	0	58	0	0	1	1	1	1	0	0	0	0	0	59	0	8.8	0	0	0
192	0	0	47	0	1	0	0	0	1	0	0	0	0	0	60	0	8.8	0	0	0
1712	0	0	48	1	1	0	1	0	0	0	0	2	0	2	60	1			0	0
1908	0	0	31	0	1	0	1	1	0	0	0	2	0	0	60	0	13.4	1	0	0
1582	0	0	67	1	1	1	1	1	1	1	0	4	0	4	60	0	6.6	0	0	0
1253	0	0	55	0	1	1	1	0	1	0	0	12	2	10	60	0	6.3	1	1	0
1560	0	0	50	1	1	0	0	1	1	0	0	2	0	0	60	0	5.5	1	0	0
1394	0	0	58	1	1	1	1	0	1	0	0	0	0	0	60	0	14	0	0	0
1207	0	0	53	0	1	1	0	1	0	1	0	2	0	0	60	1			0	0
393	0	0	55	1	0	1	0	1	0	1	1	7	4	3	61	0	11.2	1	0	0
1902	0	0	68	0	1	1	0	1	0	1	1	10	10	0	61	0	7	0	0	0
2146	0	0	69	0	1	0	0	1	1	0	0	2	0	0	61	0	13.5	1	0	0
967	0	0	52	1	1	1	1	0	0	0	0	1	0	0	61	1			0	0
2056	0	0	37	0	1	0	1	1	1	0	0	2	0	0	62	0	12.9	1	0	0
1470	0	0	53	0	1	1	0	1	0	1	1	4	4	0	62	0	13.3	1	0	0
485	0	0	57	0	0	0	1	0	0	1	1	3	3	0	62	0	8.8	0	0	0
792	0	0	27	0	1	0	0	0	1	0	0	4	0	4	62	0	13.2	1	0	0
680	0	0	45	0	1	1	0	0	0	1	1	0	0	0	62	0	13.2	0	0	0
1836	0	0	39	0	1	1	0	0	0	1	1	2	0	0	62	0	13.9	0	0	0
368	0	0	39	0	0	0	0	0	0	0	0	4	0	4	62	0	13.2	1	0	0
1867	0	0	74	0	1	1	0	0	0	1	1	3	0	3	62	0	10.2	1	0	0
82	0	0	19	0	0	0	0	0	1	0	0	0	0	0	63	0	11.2	1	0	0
121	0	0	49	0	0	1	1	0	0	0	0	15	0	15	63	1			0	0
1459	0	0	43	0	1	1	1	1	0	1	0	2	0	2	63	0	13	1	0	0
291	0	0	79	0	1	0	1	0	0	1	0	4	2	2	63	0	11.2	0	0	0
1433	0	0	55	0	1	1	1	1	1	1	0	1	0	0	63	0	14.4	1	0	0
1079	0	0	45	0	0	0	1	1	0	1	0	0	0	0	63	1			0	0
373	0	0	60	1	1	1	0	1	1	1	1	0	0	0	64	1			0	0
593	0	0	42	0	1	0	1	1	1	0	0	0	0	0	64	0	13.2	1	1	0
1719	0	0	57	0	0	0	1	1	1	1	1	2	3	3	64	0	10	1	0	0
710	0	0	53	0	1	1	0	1	1	1	1	0	0	0	64	0	13.2	1	0	0
1643	0	0	44	0	0	1	0	0	1	0	0	1	0	0	64	0	11.2	1	0	0
189	0	0	32	0	0	0	0	1	1	0	0	0	0	0	65	0	14.1	1	0	0
1468	0	0	56	1	1	1	1	1	1	1	1	3	0	3	65	0	14.5	1	0	0
618	0	0	62	1	1	1	1	0	1	0	1	0	0	0	65	0	8.8	0	0	0
604	0	0	35	1	1	0	1	1	0	1	1	10	0	10	65	1			0	0
1766	0	0	65	0	0	0	0	0	0	1	1	2	2	3	66	0	12.5	0	0	0
1979	0	0	46	0	1	1	1	0	0	0	0	0	0	0	66	0	9.1	1	0	0
2107	0	0	30	0	1	0	1	1	1	0	0	2	0	0	66	0	6.6	1	0	0
1516	0	0	50	0	1	1	1	0	1	0	0	1	0	0	66	0	11	1	0	0
615	0	0	70	0	1	1	0	1	0	1	1	10	6	3	66	0	6.7	1	0	0
1184	0	0	38	1	0	0	0	0	1	0	0	1	0	0	67	0	4.3	0	0	0
2155	0	0	53	0	0	0	1	0	0	0	0	2	0	0	67	0	9	1	0	0
1525	0	0	60	0	1	1	0	1	1	1	1	3	0	3	67	0	10.2	1	1	0
748	0	0	63	0	0	1	0	1	1	1	1	8	6	2	67	0	8.8	1	0	0
1132	0	0	63	0	1	1	0	0	1	1	1	9	1	8	67	0	9	1	1	0
1938	0	0	74	0	1	0	0	0	0	1	1	5	0	5	67	0	10.3	0	0	0
882	0	0	64	1	1	1	1	1	0	0	0	2	0	0	67	0	10	1	0	0
377	0	0	51	1	1	1	1	0	1	0	0	0	0	0	67	1			0	0
419	0	0	61	1	1	1	0	0	0	0	0	4	0	4	67	0	6.7	1	0	0
1821	0	0	62	0	1	1	1	0	1	1	1	2	2	1	67	0	10.1	1	0	0
2164	0	0	64	0	1	0	0	0	0	0	1	2	0	0	68	0	12.2	1	0	0
2141	0	0	47	0	1	1	0	1	1	1	1	2	1	7	68	0	6.6	1	0	1
1989	0	0	57	0	1	1	0	1	1	0	0	13	5	9	68	0	3.5	1	0	0
849	0	0	46	1	1	1	0	1	0	0	0	2	0	0	69	0	8.2	1	0	0
1677	0	0	55	1	0	1	0	0	0	1	1	2	3	1	70	1			0	0
558	0	0	47	1	1	1	1	1	0	1	1	4	4	0	70	1			0	0
1099	0	1	72	1	1	1	0	0	1	1	1	4	0	4	71	0	5.6	0	0	0
2174	0	0	44	0	1	1	1	1	1	0	0	2	0	0	71	0	8.5	1	0	0
546	0	0	52	0	1	1	1	1	1	1	1	0	0	0	71	1			0	0
1072	0	0	62	0	1	0	0	0	1	0	0	0	0	0	73	0	10.2	1	0	0
1982	0	0	63	1	1	1	1	0	1	0	0	2	0	0	73	0	11.8	1	0	0
1727	0	0	49	0	1	1	0	1	0	0	0	0	0	0	73	0	8.8	1	0	0
1388	0	0	44	1	1	1	1	1	1	1	0	1	0	0	75	0	10.5	0	0	0
1988	0	0	56	0	0	0	1	0	1	0	0	2	0	0	76	0	6.6	1	0	0
1502	0	0	38	1	0	1	1	1	0	0	0	2	0	0	77	0	7.4	1	0	0
631	0	0	58	1	1	1	1	1	1	1	1	0	0	0	77	0	8.8	1	0	0
2081	0	0	47	1	0	0	0	1	1	1	1	2	0	0	77	0	12.1	0	0	0
955	0	0	47	1	0	1	1	1	0	0	0	2	0	0	78	0	6.6	1	0	0
2060	0	0	69	0	1	1	1	1	0	1	1	2	0	0	78	0	10.4	1	0	0
958	0	0	53	1	1	0	1	0	1	0	0	1	0	0	78	0	9	1	0	0
716	0	0	46	0	1	0	0	1	1	0	0	0	0	0	80	0	11.2	1	0	0
1189	0	0	51	0	1	0	0	1	1	0	1	2	0	0	80	1			0	0
2147	0	0	48	0	1	1	1	1	1	0	0	3	0	3	80	0	6.7	1	0	0
140	0	0	59	1	1	1	0	1	1	0	0	0	0	0	81	0	13.2	1	0	0
887	0	0	57	0	0	1	0	0	1	0	0	2	0	0	83	0	16	1	0	0
692	0	0	65	0	1	1	0	0	1	0	0	0	0	0	88	0	8.8	1	0	0
896	0	1	59	0	1	0	1	0	1	0	0	0	0	0	89	0	8.8	1	0	0
891	0	0	67	0	0	0	1	0	1	0	0	3	0	3	90	0	8.2	0	0	0
1509	0	0	53	0	1	1	0	1	1	0	0	5	0	5	92	0	8.2	1	0	0
16	1	0	33	1	0	0	1	0	1	0	0	2	2	0	51	0	4.8	1	0	0
32	1	0	61	0	1	0	1	1	1	1	1	12	12	0	51	0	4.8	1	0	0
44	1	0	63	0	1	1	0	1	1	0	1	0	0	0	51	1			0	0
56	1	0	53	0	1	1	0	0	0	1	1	12	12	0	51	0	4.8	0	0	0
63	1	0	52	0	1	0	0	0	0	1	0	0	0	0	51	0	6.4	0	0	0
73	1	0	57	1	1	0	1	0	0	1	1	12	8	4	51	0	4.8	0	0	0
115	1	0	41	0	1	1	1	0	1	1	1	5	0	5	51	0	6.7	1	0	0
130	1	0	56	0	1	1	0	0	0	1	0	6	6	0	51	0	6.4	1	0	1
132	1	0	63	0	0	0	0	0	0	0	0	6	0	6	51	0	8.8	0	0	0
134	1	0	33	0	0	0	1	0	0	1	0	1	1	0	51	0	12.8	1	0	0
135	1	0	51	1	1	1	0	0	0	1	1	6	6	0	51	0	8.8	1	0	0
136	1	0	65	0	1	0	0	1	1	1	0	27	27	0	51	0	11.2	1	1	0
138	1	0	51	0	1	1	1	1	1	1	0	0	0	0	51	0	8.8	1	1	0
146	1	0	60	0	1	1	1	0	1	1	1	15	12	2	51	0	4.6	1	0	0
147	1	0	52	1	1	1	1	1	1	1	1	19	5	13	51	0	8.8	1	1	1
148	1	0	46	0	1	0	0	1	0	1	1	19	19	0	51	0	4.8	0	0	0
152	1	0	59	0	0	0	0	0	0	1	1	0	0	0	51	1			0	0
160	1	0	53	0	0	1	1	0	1	1	1	23	17	3	51	0	8.8	1	0	0
177	1	0	45	0	1	1	1	1	0	1	1	12	12	0	51	1			0	0
180	1	0	62	0	1	1	0	1	1	1	1	6	3	6	51	0	8.8	1	0	0
186	1	0	52	1	1	1	0	0	0	0	1	0	0	0	51	0	6.7	0	0	0
205	1	0	46	1	1	1	1	0	0	1	1	3	0	3	51	0	8.8	0	0	0
212	1	0	57	0	1	1	1	0	0	1	1	0	0	0	51	0	6.4	0	0	0
218	1	0	53	0	1	1	0	0	0	1	1	12	12	0	51	0	6.4	1	0	0
221	1	0	60	0	1	1	0	0	0	1	0	0	0	0	51	1			0	0
222	1	0	56	0	0	0	0	0	0	0	1	0	0	0	51	1			0	0
223	1	0	58	0	0	0	0	0	0	1	1	0	0	0	51	0	6.7	0	0	0
242	1	0	33	0	0	0	0	0	1	0	0	7	0	7	51	0	8.6	1	0	0
244	1	0	61	1	1	1	1	1	1	1	0	0	0	0	51	0	8.8	1	0	0
245	1	0	46	0	1	0	0	0	0	0	0	0	0	0	51	0	8.8	1	0	1
249	1	0	59	0	1	0	1	1	1	0	0	2	2	0	51	0	9.2	1	0	0
250	1	0	68	1	0	1	0	0	0	1	1	0	0	0	51	0	4.8	0	0	0
251	1	0	60	0	0	1	1	1	0	1	1	11	11	0	51	1			0	0
254	1	0	73	1	0	0	0	0	0	0	0	7	3	3	51	0	3.3	1	0	0
256	1	0	64	0	1	1	0	0	0	1	0	6	3	3	51	0	6.7	1	0	0
29	1	0	58	0	1	1	0	1	1	1	1	23	23	0	20	0	8.8	0	0	0
210	1	0	72	1	1	0	0	0	0	1	0	11	11	0	23	1			0	0
54	1	0	50	0	1	1	1	1	1	1	1	22	22	0	26	0	5.3	0	0	0
166	1	0	50	1	1	1	1	1	1	1	0	12	10	1	26	0	4.8	0	0	0
41	1	0	48	0	1	0	0	0	0	1	1	20	20	0	27	0	8.8	1	0	0
67	1	0	46	0	1	0	0	0	0	1	1	18	18	0	27	0	6.7	0	0	0
215	1	0	45	1	1	1	1	1	0	0	0	13	3	10	27	0	3.2	0	0	0
74	1	0	54	0	1	1	1	0	1	1	1	34	34	0	28	0	9.2	0	0	0
190	1	0	52	0	1	0	0	0	1	1	1	9	6	2	28	0	11.2	1	0	0
163	1	0	58	0	0	1	1	1	0	1	1	23	23	0	29	0	6.7	0	0	0
43	1	0	66	0	0	1	1	1	1	0	0	9	9	0	30	0	8.2	1	0	0
145	1	0	43	0	1	0	1	1	1	1	1	23	23	0	30	0	11.2	1	0	0
129	1	0	45	1	0	1	0	1	1	1	1	12	12	0	31	0	4.8	0	0	0
48	1	0	56	1	1	1	0	1	1	0	0	8	0	8	32	0	4.8	1	0	0
83	1	0	52	0	1	1	0	0	0	0	1	11	11	0	32	1			0	0
201	1	0	49	0	1	1	1	1	1	1	1	23	20	2	32	0	9.9	1	0	0
225	1	0	46	1	0	1	0	0	0	1	1	26	26	0	32	0	8.8	0	0	0
12	1	0	54	0	1	0	1	0	1	1	1	9	8	1	33	0	6.6	0	0	0
68	1	0	52	1	1	1	1	0	0	0	0	19	19	0	33	1			0	0
150	1	0	69	0	1	1	1	0	1	1	0	18	11	6	33	0	6.7	0	0	0
206	1	0	60	0	0	1	1	1	0	1	0	15	9	6	33	0	11	0	0	0
50	1	0	75	0	0	0	1	0	0	0	0	3	2	1	34	0	6.6	0	0	0
45	1	0	62	1	1	1	1	1	1	1	0	7	4	2	35	1			0	0
88	1	0	49	0	1	0	1	1	0	0	0	4	0	4	35	1			0	0
92	1	0	53	1	1	0	1	1	1	1	1	2	2	0	35	1			0	0
199	1	0	62	0	1	1	1	1	1	1	1	30	29	1	35	0	11	0	0	0
240	1	0	57	0	1	1	1	1	0	1	1	14	12	2	35	0	9	0	0	0
125	1	0	55	1	0	1	1	1	1	1	1	25	25	0	36	0	8.8	1	0	0
233	1	0	60	0	1	1	0	1	0	1	1	32	32	0	36	0	11.2	1	0	0
234	1	0	59	0	1	1	0	0	1	1	1	32	32	0	36	0	6.6	1	0	0
5	1	0	47	0	1	1	1	1	1	1	1	7	7	0	37	0	13.2	1	0	0
40	1	0	45	0	1	0	1	1	1	1	0	14	12	3	37	0	8.8	1	0	0
172	1	0	55	1	1	1	0	0	0	0	0	2	2	2	37	0	6.7	1	0	0
9	1	0	54	1	1	1	1	1	1	1	1	12	11	0	38	1			0	0
14	1	0	54	0	1	0	1	1	0	0	0	6	0	6	38	1			0	0
107	1	0	69	1	1	0	0	0	0	0	0	2	2	0	38	1			0	0
204	1	0	60	0	1	1	0	0	0	1	1	8	8	0	38	1			0	0
219	1	0	64	0	1	0	1	1	1	1	0	0	0	0	38	1			0	0
4	1	0	58	0	0	0	1	1	0	1	1	11	6	5	39	1			0	0
46	1	0	64	1	1	1	1	1	1	1	0	10	4	5	39	1			0	0
133	1	0	32	0	0	0	1	0	0	0	1	0	0	0	39	0	14.1	1	0	0
257	1	0	51	1	1	1	1	1	0	1	1	29	29	0	39	1			0	0
24	1	0	59	1	1	0	1	0	0	1	1	3	3	0	40	1			0	0
53	1	0	51	1	1	1	1	1	0	1	1	5	5	0	40	0	8	1	0	0
90	1	0	56	0	1	1	1	0	1	0	0	0	0	0	40	0	8.8	1	0	0
116	1	0	65	1	1	1	1	1	0	1	0	4	0	4	40	1			0	0
179	1	0	53	1	1	1	0	0	0	1	1	7	4	2	40	0	8.8	0	0	0
28	1	0	41	1	1	1	1	0	1	1	1	0	0	0	41	0	11.2	1	0	0
33	1	0	53	0	1	1	1	0	1	1	1	5	2	2	41	1			0	0
1	1	0	45	1	1	1	0	0	0	1	1	4	0	4	42	1			0	0
61	1	0	58	1	0	0	1	0	0	1	0	21	14	5	42	0	6.4	0	0	0
85	1	0	55	1	1	1	1	0	1	0	0	4	4	0	42	0	12.1	1	0	0
87	1	0	63	1	0	1	1	0	1	1	1	27	21	3	42	0	8.8	1	0	0
96	1	0	47	1	1	1	1	1	1	1	0	10	7	3	42	0	6.8	1	0	0
140	1	0	37	1	0	1	0	0	1	1	1	0	0	0	42	0	9	1	0	1
167	1	0	51	0	1	1	1	1	0	1	1	10	10	0	42	1			0	0
6	1	0	57	1	1	0	1	0	1	0	0	0	0	0	43	0	4.8	0	0	0
10	1	0	57	1	1	0	1	0	1	0	0	0	0	0	43	0	7.7	1	0	0
120	1	0	59	0	1	1	1	1	1	0	0	2	4	0	43	0	10.5	0	0	0
171	1	0	59	1	1	0	1	0	1	0	0	0	0	0	43	0	8.8	0	0	0
211	1	0	61	0	1	0	0	1	0	1	1	9	6	3	43	0	14	1	0	0
86	1	0	56	1	0	1	1	1	0	0	0	2	2	0	44	0	13.1	0	0	0
188	1	0	33	0	0	0	1	0	0	1	0	3	3	0	44	0	13.2	1	0	0
192	1	0	53	0	1	0	1	0	1	1	1	0	0	0	44	1			0	0
203	1	0	45	0	1	1	1	1	1	1	0	6	6	0	44	0	6.7	1	0	0
36	1	0	44	0	1	1	0	1	0	1	1	0	0	0	45	0	4.5	0	0	0
52	1	0	44	0	1	1	0	1	1	1	1	0	0	0	45	0	6.7	0	0	0
75	1	0	69	0	1	0	0	0	0	0	0	2	2	0	45	0	8.8	1	0	0
84	1	0	48	1	0	1	1	1	1	0	0	2	2	0	45	0	5.4	0	0	0
119	1	0	49	1	0	0	1	1	1	0	0	2	2	0	45	0	9.9	0	0	0
156	1	0	65	0	1	1	1	1	1	1	1	15	15	0	45	1			0	0
157	1	0	66	0	1	1	1	1	1	1	1	15	15	0	45	1			0	0
51	1	0	48	0	1	0	0	1	1	0	0	0	0	0	46	0	8.8	1	0	0
108	1	0	51	0	1	0	1	1	1	1	1	5	5	0	46	0	13.3	1	0	0
142	1	0	34	0	1	1	1	0	1	0	0	2	2	0	46	0	14.5	1	0	0
154	1	0	54	0	0	1	1	1	0	1	1	6	0	6	46	0	6.7	0	0	0
22	1	0	34	1	1	0	1	0	1	1	0	9	9	0	47	1			0	0
112	1	0	43	1	1	1	1	0	1	1	1	9	6	3	47	0	8.8	0	0	0
169	1	0	56	1	1	1	0	0	1	0	0	7	0	7	47	0	8.8	1	0	0
183	1	0	49	0	1	1	1	1	1	1	1	2	2	4	47	0	11.5	1	0	0
196	1	0	48	0	0	1	0	0	0	1	0	2	2	7	47	0	6.7	0	0	0
209	1	0	47	0	1	0	1	1	0	0	0	0	0	0	47	0	13	1	0	0
34	1	0	57	1	1	0	0	0	1	1	1	0	0	0	48	0	4.8	1	1	0
155	1	0	64	1	1	1	1	0	1	1	0	0	0	0	48	0	6.7	0	0	0
174	1	0	53	0	0	0	0	0	0	0	0	2	2	0	48	1			0	0
191	1	0	42	0	1	1	1	1	1	1	0	7	6	1	48	0	9	1	0	0
193	1	0	20	0	0	0	1	1	0	0	0	0	0	0	48	1			0	0
213	1	0	47	0	0	1	0	0	0	1	1	4	4	0	48	0	13.2	1	0	0
235	1	0	55	0	1	0	1	1	1	1	1	6	3	3	48	0	10	0	0	0
248	1	0	48	0	0	1	0	1	0	1	1	9	5	4	48	0	13.2	0	0	0
21	1	0	67	1	0	1	1	1	1	1	0	8	2	6	49	0	4.8	0	0	0
80	1	0	63	0	1	0	1	1	1	1	1	2	2	0	49	1			0	0
97	1	0	58	1	1	1	0	0	1	1	0	0	0	0	49	0	9	1	0	0
122	1	0	54	1	0	1	1	1	0	0	0	14	8	4	49	0	12.4	1	0	0
128	1	0	64	1	1	1	1	0	1	1	1	0	0	0	49	0	9	0	0	0
141	1	0	51	0	1	0	0	0	1	0	0	0	0	0	49	0	8.5	1	0	0
175	1	0	38	0	1	0	0	0	1	0	0	0	0	0	49	0	13.2	0	0	0
176	1	0	55	0	1	1	1	0	1	1	1	20	20	0	49	1			0	0
194	1	0	47	0	0	0	1	0	1	0	0	1	1	0	49	0	15.6	0	0	0
217	1	0	45	0	0	1	0	0	0	1	1	5	2	2	49	0	8.8	0	0	0
226	1	0	33	0	0	1	1	1	1	0	1	0	0	0	49	0	9.5	0	0	0
246	1	0	41	0	1	1	1	1	0	1	0	2	2	0	49	1			0	0
20	1	0	61	1	1	1	1	0	1	0	0	2	2	0	50	0	4.6	0	0	0
30	1	0	42	0	0	0	0	0	0	1	1	2	2	0	50	0	10.1	0	0	0
42	1	0	50	1	1	1	0	0	0	0	0	5	0	5	50	0	6.4	0	0	0
105	1	0	58	0	1	1	0	1	1	1	1	0	0	0	50	0	13.2	0	0	0
139	1	0	57	0	1	1	0	0	1	1	1	2	2	0	50	0	4.6	0	0	0
144	1	0	38	0	0	0	1	0	1	1	1	0	0	0	50	0	6.7	0	0	0
159	1	0	48	0	0	1	1	0	0	1	0	8	6	2	50	0	10	1	0	0
178	1	0	44	1	0	1	1	0	0	1	1	7	2	5	50	0	8.8	1	0	0
229	1	0	47	0	1	1	1	0	1	1	1	0	0	0	50	0	8.8	0	0	0
8	1	0	49	1	1	1	1	1	1	0	0	2	2	0	51	0	10.6	0	0	0
26	1	0	58	0	1	1	1	0	1	1	1	23	23	0	51	0	6.7	0	0	0
81	1	0	40	0	0	1	1	1	0	1	0	2	2	0	51	0	11.2	0	0	0
131	1	0	63	1	1	1	1	0	0	0	0	0	0	0	51	1			0	0
143	1	0	42	1	1	0	1	1	0	0	0	2	2	0	51	0	7	0	0	0
236	1	0	44	0	1	1	1	1	1	0	0	23	15	8	51	1			0	0
241	1	0	65	0	0	0	0	0	0	1	1	3	3	0	51	0	8.9	0	0	0
3	1	0	57	0	1	0	1	0	0	0	0	6	0	6	52	1			0	0
82	1	0	61	0	1	1	0	0	0	1	1	6	6	0	52	0	4.8	0	0	0
89	1	0	52	1	1	0	0	0	0	1	0	1	1	0	52	0	12.9	1	0	0
127	1	0	48	1	1	1	0	0	1	1	1	3	0	3	52	1			0	0
151	1	0	28	0	0	0	0	0	0	0	0	0	0	0	52	1			0	0
153	1	0	75	0	1	0	0	0	1	1	0	1	1	1	52	1			0	0
189	1	0	37	0	1	1	1	1	1	0	0	0	0	0	52	0	13.1	0	0	0
2	1	0	42	1	1	0	0	0	0	0	0	1	1	0	53	0	8.8	1	0	0
13	1	0	54	1	1	0	1	1	0	0	0	8	8	0	53	0	5.9	0	0	0
64	1	0	53	1	1	0	1	1	1	0	0	2	2	0	53	0	12	0	0	0
101	1	0	52	1	1	1	1	1	1	1	1	5	5	0	53	0	6.7	1	0	0
208	1	0	49	1	1	1	1	0	1	0	0	0	0	0	53	0	6.6	1	0	0
11	1	0	59	0	1	1	1	1	1	0	0	2	2	0	54	1			0	0
55	1	0	62	0	1	1	1	1	1	1	1	5	0	5	54	0	10.6	1	0	0
149	1	0	52	1	0	0	1	0	0	0	0	2	2	0	54	0	4.8	1	0	0
239	1	0	62	0	1	1	0	0	0	1	0	0	0	0	54	1			0	0
247	1	0	61	0	1	1	0	0	1	0	1	5	0	5	54	1			0	0
31	1	0	52	0	1	1	0	0	1	1	1	0	0	0	55	0	11.2	1	0	0
49	1	0	40	0	0	0	1	0	1	1	0	0	0	0	55	0	15	1	0	0
58	1	0	29	0	1	1	0	0	0	1	1	0	0	0	55	1			0	0
59	1	0	53	0	1	1	0	0	0	1	0	9	9	0	55	0	8.8	0	0	0
103	1	0	45	0	1	1	0	0	1	0	0	2	2	0	55	0	12.7	0	0	0
109	1	0	53	0	0	0	0	1	1	0	0	2	2	0	55	0	12.9	1	0	0
162	1	0	55	0	1	0	0	1	1	0	0	0	0	0	55	1			0	0
237	1	0	60	0	1	1	1	1	0	0	1	0	0	0	55	0	11.2	0	0	0
253	1	0	66	1	1	1	0	1	1	0	0	2	2	0	55	0	9.1	0	0	0
15	1	0	46	0	0	1	1	0	0	1	1	4	4	0	56	0	11	1	0	1
66	1	0	43	0	0	1	1	1	0	1	1	7	7	0	56	0	8.8	0	0	0
118	1	0	40	0	0	0	0	0	1	0	0	1	1	0	56	0	6.7	0	0	0
195	1	0	45	1	1	1	1	1	1	0	0	3	0	3	56	1			0	0
60	1	0	60	1	0	0	1	1	0	0	0	2	2	0	57	0	6.6	0	0	0
91	1	0	66	0	1	1	1	0	1	0	0	2	2	0	57	0	7.8	1	0	0
117	1	0	52	0	1	1	0	1	0	1	1	7	3	4	57	0	8.8	1	0	0
173	1	0	45	1	0	1	1	1	1	1	1	5	0	5	57	0	7.6	1	0	0
197	1	0	63	0	1	0	1	0	1	1	0	2	2	0	57	0	4.8	0	0	0
207	1	0	62	1	1	0	1	1	0	1	1	0	0	0	57	1			0	0
72	1	0	73	0	0	1	1	0	1	0	0	2	2	0	58	0	8.8	1	0	0
79	1	0	53	0	1	1	1	1	1	0	0	0	0	0	58	1			0	0
113	1	0	68	0	1	1	0	0	0	1	1	12	12	0	58	0	8.8	0	0	0
114	1	0	39	1	0	1	1	1	0	0	0	2	2	0	58	0	9	1	0	0
124	1	0	47	0	0	0	0	1	1	1	1	0	0	0	58	0	11.2	1	0	0
184	1	0	22	0	1	0	0	0	1	0	0	2	2	0	58	0	11	1	0	0
216	1	0	58	0	1	1	0	0	0	0	0	2	2	0	58	0	8.8	0	0	0
230	1	0	62	0	1	0	1	0	1	0	0	2	2	0	58	0	9	1	0	0
252	1	0	50	0	1	0	0	0	0	0	0	2	2	0	58	0	11.2	0	0	0
255	1	0	58	0	0	1	1	1	1	1	1	0	0	0	58	0	8.8	0	0	0
38	1	0	36	0	1	1	1	0	1	0	0	0	0	0	59	0	8.8	0	0	0
62	1	0	30	0	0	0	1	0	1	0	0	3	0	3	59	0	12.6	1	0	0
104	1	0	52	0	0	1	0	1	0	1	0	3	3	0	59	0	8.8	1	0	0
39	1	1	53	0	1	1	0	0	1	0	0	0	0	0	60	0	4.8	0	0	0
47	1	0	64	1	1	1	1	1	1	1	1	4	0	4	60	1			0	0
123	1	0	40	0	0	0	0	0	0	1	1	0	0	0	60	0	6.7	0	0	0
185	1	0	44	1	1	0	0	1	0	0	0	1	1	0	60	1			0	0
187	1	0	57	1	1	0	1	0	1	0	0	2	2	0	60	0	13	1	0	0
228	1	0	56	1	1	0	1	0	1	1	1	0	0	0	60	0	6.7	0	0	0
18	1	0	47	1	0	1	0	1	0	0	0	2	2	0	61	0	12.9	1	0	0
37	1	0	59	0	0	1	1	1	0	1	1	0	0	0	61	0	11.2	1	0	0
71	1	0	76	0	0	0	0	0	0	0	0	2	2	0	61	0	8.8	1	0	0
126	1	0	46	1	0	1	1	1	1	0	0	0	0	0	61	0	8	0	0	0
25	1	0	58	0	0	1	0	0	0	0	0	2	2	0	62	0	11	1	0	0
57	1	0	50	0	1	1	1	0	1	0	0	2	2	0	62	0	11	1	0	0
76	1	0	54	0	1	1	1	0	1	1	1	2	2	0	62	0	4.2	1	0	1
94	1	0	43	0	0	0	1	1	1	0	0	1	1	0	62	0	6	0	0	0
161	1	0	46	0	1	0	0	0	1	0	0	1	1	0	62	0	14.1	0	0	0
200	1	0	57	1	1	1	0	0	0	0	0	0	0	0	62	1			0	0
258	1	0	38	0	1	0	1	1	0	0	0	0	0	0	62	0	13	0	0	0
7	1	0	50	0	1	1	1	1	1	0	0	9	5	3	63	0	11	0	0	0
77	1	0	63	1	1	1	0	1	0	0	0	2	2	0	63	0	11	1	0	0
181	1	0	54	1	1	1	1	0	1	1	1	6	3	4	63	0	9.8	1	0	0
98	1	0	62	0	1	0	0	0	1	0	0	2	2	0	64	0	7.2	1	0	0
227	1	0	58	1	0	1	1	1	1	0	0	8	8	0	64	1			0	0
17	1	0	63	0	1	1	1	0	0	1	0	6	6	0	65	0	11	0	0	0
23	1	0	33	1	1	0	1	1	1	0	0	0	0	0	65	1			0	0
65	1	0	62	1	1	1	1	0	1	0	1	0	0	0	65	0	8.8	0	0	0
106	1	0	47	0	1	1	1	1	0	0	0	2	2	0	65	0	4.6	0	0	0
111	1	0	49	1	1	1	0	0	1	0	0	0	0	0	65	1			0	0
164	1	0	68	1	1	1	1	0	1	1	0	6	6	0	65	0	6.6	1	0	0
165	1	0	62	0	1	1	1	1	1	0	0	0	0	0	65	0	11.2	0	0	0
243	1	0	56	0	0	0	1	0	1	0	0	2	2	0	65	0	4.6	0	0	0
19	1	0	46	1	1	1	1	1	0	1	1	0	0	0	66	0	11.2	0	0	0
231	1	0	50	0	1	1	0	0	0	0	0	0	0	0	66	0	6.7	0	0	0
238	1	0	53	0	0	0	0	0	1	0	0	2	2	0	66	0	13.2	1	0	0
78	1	0	47	0	1	1	0	1	1	0	1	18	0	18	67	0	11.2	0	0	0
70	1	0	39	1	1	1	1	0	1	0	0	0	0	0	68	0	6.7	1	0	0
95	1	0	56	0	1	1	0	0	1	0	1	10	10	0	68	0	6.7	0	0	0
158	1	0	56	1	0	1	1	1	1	0	0	3	0	3	68	0	10.6	0	0	0
202	1	0	44	0	1	0	0	0	0	0	0	2	2	0	68	0	4.8	0	0	0
100	1	0	69	0	1	1	1	1	1	1	0	1	1	0	69	1			0	0
110	1	0	53	0	1	1	1	1	1	0	1	1	1	1	69	0	10.5	0	0	0
27	1	0	46	0	1	0	1	0	1	1	0	0	0	0	70	0	8.8	1	0	0
35	1	0	58	0	1	1	0	0	0	0	0	2	2	0	70	1			0	0
220	1	0	56	1	1	1	1	1	0	0	0	2	2	0	70	0	6.6	1	0	0
224	1	0	52	0	1	1	0	1	0	0	0	2	2	0	70	0	11.2	0	0	0
99	1	0	47	1	0	1	0	1	1	0	0	1	1	0	71	1			0	0
121	1	0	69	1	0	1	1	0	1	0	0	2	2	0	71	0	5.9	1	0	0
182	1	0	61	1	1	0	1	0	0	0	0	2	2	0	72	1			0	0
170	1	0	62	1	1	0	0	0	1	0	1	0	0	0	74	0	4.8	0	0	0
198	1	0	46	0	1	1	0	0	1	0	0	2	2	0	74	0	10.4	1	0	0
93	1	0	53	0	1	1	1	1	1	1	0	0	0	0	78	1			0	0
102	1	0	65	1	1	1	1	1	1	1	1	6	6	0	78	0	11	1	0	0
168	1	0	58	0	1	1	0	0	0	0	1	3	0	3	81	0	4.2	0	0	0
137	1	0	56	1	1	1	1	1	1	0	0	0	0	0	82	0	12	1	0	0
69	1	0	61	1	1	1	0	1	1	0	0	2	2	0	85	1			0	0
214	1	0	79	0	1	1	1	1	1	1	1	0	0	0	89	1			0	0
232	1	1	66	0	0	1	1	0	1	0	0	2	2	0	99	0	7	1	0	0
